# Supplementary material for: Rivaling the World's Smallest Reptiles: Discovery of Miniaturized and Microendemic New Species of Leaf Chameleons (Brookesia) from Northern Madagascar
Source: PubMed Central journal article supplement (PMC3279364; doi:10.1371/journal.pone.0031314), 2012-02-14
Supplement: pone.0031314.s001.pdf [file pone.0031314.s001.pdf]

**Supporting information of the manuscript:**

**Rivalling the World's Smallest Reptiles: Discovery of Miniaturized and Microendemic New Species of Leaf Chameleons (*Brookesia*) from Northern Madagascar**

Frank Glaw, Jörn Köhler, Ted M. Townsend, Miguel Vences

**Content:**

**Table S1.** List of voucher specimens and GenBank accession numbers for all DNA sequences included in the analysis.

**Table S2.** Divergence-date calibration priors.

**Table S3.** Morphometric measurements (in mm) of additional examined specimens of species in the *Brookesia minima* group.

**Table S4.** Variation of selected morphological characters in examined specimens of the *Brookesia minima* group.

**Morphological identification key to the species of the *Brookesia minima* group**

**Supplementary figures S1-S6**

**Table S1. List of voucher specimens and GenBank accession numbers for all DNA sequences included in the analysis.**

| <b>Species</b>                 | <b>Voucher #</b>              | <b>ND2</b> | <b>16S</b>              |
|--------------------------------|-------------------------------|------------|-------------------------|
| <b>Outgroups</b>               |                               |            |                         |
| <i>Brookesia brygooi</i>       | FGZC 689 (ZSM 12/2006)        | FJ975191   | KUZ R61408<br>JN674044  |
| <i>Brookesia nasus</i>         | FGMV 445 (ZSM 728/2003)       | FJ975158   | HQ13509                 |
| <i>Brookesia superciliaris</i> | HDZ-CCR BM 24                 | AF448778   | UADBA 20730<br>HQ130513 |
| <b>Miniaturized clade</b>      |                               |            |                         |
| <i>Brookesia confidens</i>     | FGZC 1194                     | JN673976   | --                      |
| <i>Brookesia confidens</i>     | FGZC 1195                     | JN673981   | --                      |
| <i>Brookesia confidens</i>     | FGZC 1196                     | JN673978   | JN674045                |
| <i>Brookesia confidens</i>     | FGZC 1197                     | JN673977   | --                      |
| <i>Brookesia confidens</i>     | FGZC 1198                     | JN673979   | --                      |
| <i>Brookesia confidens</i>     | FGZC 1199                     | JN673980   | --                      |
| <i>Brookesia dentata</i>       | KUZ R58383                    | FJ975174   | JN674046                |
| <i>Brookesia desperata</i>     | FGZC 1250                     | JN673996   | --                      |
| <i>Brookesia desperata</i>     | FGZC 1251                     | JN673997   | --                      |
| <i>Brookesia desperata</i>     | FGZC 1252                     | JN673998   | --                      |
| <i>Brookesia desperata</i>     | FGZC 1253                     | JN673999   | --                      |
| <i>Brookesia desperata</i>     | FGZC 1255                     | JN673982   | --                      |
| <i>Brookesia desperata</i>     | FGZC 1256                     | JN673983   | --                      |
| <i>Brookesia desperata</i>     | FGZC 1257                     | JN673984   | --                      |
| <i>Brookesia desperata</i>     | FGZC 1258                     | JN673985   | --                      |
| <i>Brookesia desperata</i>     | FGZC 1259                     | JN673986   | --                      |
| <i>Brookesia desperata</i>     | FGZC 1260                     | JN673987   | --                      |
| <i>Brookesia desperata</i>     | FGZC 1261                     | JN673988   | --                      |
| <i>Brookesia desperata</i>     | FGZC 1262                     | JN673989   | --                      |
| <i>Brookesia desperata</i>     | FGZC 1263                     | JN673990   | --                      |
| <i>Brookesia desperata</i>     | FGZC 1264                     | JN673991   | --                      |
| <i>Brookesia desperata</i>     | FGZC 1265                     | JN673992   | --                      |
| <i>Brookesia desperata</i>     | FGZC 1266                     | JN673993   | --                      |
| <i>Brookesia desperata</i>     | FGZC 1267                     | JN674003   | --                      |
| <i>Brookesia desperata</i>     | FGZC 1268                     | JN673994   | --                      |
| <i>Brookesia desperata</i>     | FGZC 1269                     | JN673995   | --                      |
| <i>Brookesia desperata</i>     | FGZC 1700                     | JN674000   | --                      |
| <i>Brookesia desperata</i>     | FGZC 1879                     | JN674001   | --                      |
| <i>Brookesia desperata</i>     | FGZC 1880                     | JN674002   | JN674047                |
| <i>Brookesia exarmata</i>      | FGZC 744                      | JN674004   | --                      |
| <i>Brookesia exarmata</i>      | FGZC 816 (ZSM 72/2006)        | FJ975175   | JN674048                |
| <i>Brookesia exarmata</i>      | FGZC 965 (ZSM 147/2006)       | FJ975176   | --                      |
| <i>Brookesia karchei</i>       | UADBA 27293                   | FJ975169   | --                      |
| <i>Brookesia karchei</i>       | FGZC 2005.2752 (ZSM 125/2005) | FJ975170   | JN674049                |
| <i>Brookesia micra</i>         | FGZC 1270                     | JN674005   | --                      |
| <i>Brookesia micra</i>         | FGZC 1271                     | JN674006   | --                      |
| <i>Brookesia micra</i>         | FGZC 1272                     | JN674007   | --                      |
| <i>Brookesia micra</i>         | FGZC 1273                     | JN674008   | --                      |

|                                     |                         |          |          |
|-------------------------------------|-------------------------|----------|----------|
| <i>Brookesia micra</i>              | FGZC 1274               | JN674009 | --       |
| <i>Brookesia micra</i>              | FGZC 1275               | JN674010 | --       |
| <i>Brookesia micra</i>              | FGZC 1276               | JN674011 | --       |
| <i>Brookesia micra</i>              | FGZC 1277               | JN674012 | --       |
| <i>Brookesia micra</i>              | FGZC 1278               | JN674013 | --       |
| <i>Brookesia micra</i>              | FGZC 1279               | JN674014 | --       |
| <i>Brookesia micra</i>              | FGZC 1280               | JN674015 | --       |
| <i>Brookesia micra</i>              | FGZC 1281               | JN674016 | --       |
| <i>Brookesia micra</i>              | FGZC 1282               | JN674017 | --       |
| <i>Brookesia micra</i>              | FGZC 1830               | JN674018 | --       |
| <i>Brookesia micra</i>              | FGZC 1831               | JN674019 | JN674050 |
| <i>Brookesia micra</i>              | FGZC 1832               | JN674020 | --       |
| <i>Brookesia micra</i>              | FGZC 1833               | JN674021 | --       |
| <i>Brookesia micra</i>              | FGZC 1834               | JN674022 | --       |
| <i>Brookesia minima</i>             | FGMV 724                | JN674023 | --       |
| <i>Brookesia minima</i>             | FGMV 725                | JN674024 | --       |
| <i>Brookesia minima</i>             | UADBA FGMV 786          | FJ975164 | JN674051 |
| <i>Brookesia minima</i>             | UADBA FGMV 787          | FJ975165 | --       |
| <i>Brookesia peyrierasi</i>         | ZCMV 2189               | JN674025 | --       |
| <i>Brookesia peyrierasi</i>         | ZCMV 2190               | JN674026 | --       |
| <i>Brookesia peyrierasi</i>         | ZCMV 2191 (ZSM435/2005) | FJ975171 | --       |
| <i>Brookesia peyrierasi</i>         | ZCMV 2192 (ZSM436/2005) | FJ975172 | JN674052 |
| <i>Brookesia peyrierasi</i>         | ZCMV 2193               | JN674027 | --       |
| <i>Brookesia peyrierasi</i>         | ZCMV 2194               | JN674028 | --       |
| <i>Brookesia peyrierasi</i>         | ZCMV 2195               | JN674029 | --       |
| <i>Brookesia ramanantsoai</i>       | ZSM 10/2009             | FJ975173 | JN674053 |
| <i>Brookesia</i> sp.<br>"Betampona" | HDZ-CCR BET 11          | FJ975162 | --       |
| <i>Brookesia</i> sp.<br>"Betampona" | HDZ-CCR BET 130         | FJ975163 | JN674054 |
| <i>Brookesia tristis</i>            | UADBA FGZC 2004.477     | FJ975167 | --       |
| <i>Brookesia tristis</i>            | UADBA FGZC 2004.478     | FJ975168 | JN674055 |
| <i>Brookesia tristis</i>            | FGZC 1101               | JN674030 | --       |
| <i>Brookesia tristis</i>            | FGZC 1187               | JN674031 | --       |
| <i>Brookesia tristis</i>            | FGZC 1188               | JN674032 | --       |
| <i>Brookesia tristis</i>            | FGZC 1189               | JN674033 | --       |
| <i>Brookesia tristis</i>            | FGZC 1190               | JN674034 | --       |
| <i>Brookesia tristis</i>            | FGZC 1191               | JN674035 | --       |
| <i>Brookesia tristis</i>            | FGZC 1192               | JN674036 | --       |
| <i>Brookesia tristis</i>            | FGZC 1656               | JN674037 | --       |
| <i>Brookesia tristis</i>            | FGZC 1657               | JN674038 | --       |
| <i>Brookesia tristis</i>            | FGZC 1734               | JN674039 | --       |
| <i>Brookesia tuberculata</i>        | UADBA FGZC 2004.479     | FJ975166 | JN674056 |
| <i>Brookesia tuberculata</i>        | FGZC 1081               | JN674040 | --       |
| <i>Brookesia tuberculata</i>        | FGZC 1082               | JN674041 | --       |
| <i>Brookesia tuberculata</i>        | FGZC 1083               | JN674042 | --       |
| <i>Brookesia tuberculata</i>        | FGZC 1119               | JN674043 | --       |

| <b>Species</b>                      | <b>Voucher #</b>              | <b>CMOS</b> | <b>RAG1</b> |
|-------------------------------------|-------------------------------|-------------|-------------|
| <b>Outgroups</b>                    |                               |             |             |
| <i>Brookesia brygooi</i>            | KUZ R61408                    | FJ984305    | FJ984235    |
| <i>Brookesia nasus</i>              | FGMV 445 (ZSM 728/2003)       | FJ984273    | FJ984202    |
| <i>Brookesia superciliaris</i>      | UADBA 20730                   | FJ984303    | FJ984233    |
| <b>Miniaturized clade</b>           |                               |             |             |
| <i>Brookesia confidens</i>          | FGZC 1196                     | JN674057    | JN674060    |
| <i>Brookesia dentata</i>            | KUZ R58383                    | FJ984289    | FJ984218    |
| <i>Brookesia desperata</i>          | FGZC 1880                     | JN674058    | JN674061    |
| <i>Brookesia exarmata</i>           | FGZC 816 (ZSM 72/2006)        | FJ984291    | FJ984219    |
| <i>Brookesia karchei</i>            | FGZC 2005.2752 (ZSM 125/2005) | FJ984285    | FJ984214    |
| <i>Brookesia micra</i>              | FGZC 1831                     | JN674059    | JN674062    |
| <i>Brookesia minima</i>             | UADBA FGMV 786                | FJ984280    | FJ984208    |
| <i>Brookesia peyrierasi</i>         | ZSM 435/2005 (ZCMV 2005.2191) | FJ984286    | FJ984215    |
| <i>Brookesia ramanantsoai</i>       | ZSM 10/2009                   | FJ984288    | FJ984217    |
| <i>Brookesia</i> sp.<br>"Betampona" | HDZ-CCR BET 11                | FJ984277    | FJ984207    |
| <i>Brookesia tristis</i>            | UADBA FGZC 2004.477           | FJ984282    | FJ984211    |
| <i>Brookesia tuberculata</i>        | UADBA FGZC 2004.479           | FJ984281    | FJ984210    |

**Table S2. Divergence-date calibration priors.**

The second column gives the actual zero-offset and parameter values for the translated lognormal (TL) distribution as entered in BEAUti [S1]. The third column describes the effective median and upper and lower bounds of the 95% confidence interval (CI), given in millions of years ago (Mya), produced by each TL distribution. Unless otherwise stated, all stratigraphic dates used for calibration purposes are from Gradstein et al. (2004) [S2].

| Node | TL zero-offset (mean, st.dev.) | Median (95% CI) (Mya) |
|------|--------------------------------|-----------------------|
| 1    | 224 (2.0, 1.2)                 | 231 (225, 301)        |
| 2    | 161 (1.8, 1.2)                 | 167 (162, 204)        |
| 3    | 110 (1.8, 1.3)                 | 116 (111, 187.3)      |
| 4    | 110 (1.8, 1.3)                 | 116 (111, 187.3)      |
| 5    | 70 (1.8, 1.0)                  | 76 (71, 113)          |
| 6    | 70 (1.8, 1.0)                  | 76 (71, 113)          |
| 7    | 70 (1.2, 1.9)                  | 73 (70, 208)          |
| 8    | 69 (1.8, 1.0)                  | 72 (70, 125)          |

**Calibration nodes.**

**Node 1.** The oldest known rhynchocephalians [S3,S4] from the Ladinian-Carnian boundary ( $228 \pm 2.0$  Mya) were used to calibrate the node defining Lepidosauria (Rhynchocephalia [represented by *Sphenodon punctatus*] and Squamata [all other sampled taxa]).

**Node 2.** The stem scincomorph *Balnealacerta* [S5,S6] from the Middle Jurassic ( $164.7 \pm 4.0$  Mya) was used to calibrate the node defining Unidentata (all squamates except Gekkota and Dibamidae). We note that Scincomorpha is traditionally defined to encompass Scincidae, Cordylidae, Xantusiidae, Teiidae, Gymnophthalmidae, and Lacertidae, which is a paraphyletic assemblage in our tree. There is some disagreement amongst morphologists/paleontologists as to which subgroup(s) among these taxa *Balnealacerta* and other “scincomorphs” from the same site are more closely related to. From the possible alternatives, we chose the deepest (i.e., more conservative in terms of pushing divergence dates further into the past) node for our calibration point.

**Node 3.** Stem teiids including *Ptilodon* and other indeterminate taxa [S7,S8] from the Aptian-Albian boundary ( $112 \pm 1.0$  Mya) were used to calibrate the node defining Laterata (Teiioidea, Amphisbaenia, and Lacertidae).

**Node 4.** The stem amphisbaenian *Hodzhakulia* [S9] from the Aptian-Albian boundary ( $112 \pm 1.0$  Mya) was used to calibrate the node defining Lacertibaenia (Amphisbaenia and Lacertidae).

**Node 5.** The possibly stem varanid genus *Palaeosaniwa* [S10] from the Campanian ( $70.6 \pm 0.6$  Mya) was used to calibrate the node defining Paleoanguimorpha (Shinisauridae, Lanthanotidae, and Varanidae).

**Node 6.** The anguid *Odaxosaurus* [S10,S11] from the Campanian ( $70.6 \pm 0.6$  Mya) was used to calibrate the node representing the most recent common ancestor (MRCA) of Xenosauridae and Anguidae.

**Node 7.** The node defining crown Iguania was calibrated using Campanian ( $70.6 \pm 0.6$  Mya) fossils of the stem acrodont iguanian clade Priscagaminae [S12].

**Node 8.** The crown-group pleurodont iguanian *Saichangurvel* [S13] from the Late Campanian ( $70.6 \pm 0.6$  Mya) was used to calibrate the node defining crown Pleurodonta.

**Table S2 References**

- S1. Drummond AJ, Rambaut A (2007) BEAST: Bayesian evolutionary analysis by sampling trees. BMC Evol Biol 7: 214.
- S2. Gradstein FM, Ogg JG, Smith AG (2004) A Geologic Time Scale 2004. Cambridge, UK: Cambridge University Press.
- S3. Sues HD, Olsen PE (1990) Triassic vertebrates of Gondwanan aspect from the Richmond Basin of Virginia. Science 249: 1020-1023.
- S4. Evans SE, Prasad GVR, Manhas BK (2001) Rhynchocephalians (Diapsida : Lepidosauria) from the Jurassic Kota Formation of India. Zool J Linn Soc 133: 309-334.

- S5. Evans SE (1993) Jurassic lizard assemblages. In: Buffetaut E, Mazin J-M, editors. Proceedings of the Second Georges Cuvier Symposium, Revue de Paleobiologie, Special Volume 7. pp. 55-65.
- S6. Evans SE (1998) Crown-group lizards from the Middle Jurassic of Britain. *Palaeontographica A* 250: 1-32.
- S7. Winkler DA, Murry PA, Jacobs LL (1990) Early Cretaceous (Comanchean) vertebrates of central Texas. *J Vert Paleontol* 10: 95-116.
- S8. Nydam RL, Cifelli RL (2002) Lizards from the Lower Cretaceous (Aptian-Albian) Antlers and Cloverly Formations. *J Vert Paleontol* 22: 286-298.
- S9. Gao KQ, Nesson LA (1998) Early Cretaceous squamates from the Kyzylkum Desert, Uzbekistan. *Neues Jahrbuch für Geologische und Paläontologische Abhandlungen* 207: 289-309.
- S10. Bryant LJ (1989) Non-dinosaurian lower vertebrates across the Cretaceous-Tertiary boundary in northeastern Montana. *University of California Publications in Geological Sciences* 134: 1-107.
- S11. Sullivan RM, Lucas SG (1996) *Palaeoscincosaurus middletoni*, new genus and species (Squamata: Scincidae) from the early Paleocene (Puercan) Denver Formation, Colorado. *J Vert Paleontol* 16: 666-672.
- S12. Gao KQ, Norell MA (2000) Taxonomic composition and systematics of Late Cretaceous lizard assemblages from Ukhaa Tolgod and adjacent localities, Mongolian Gobi Desert. *Bull Am Mus Nat Hist* 249: 1-118.
- S13. Conrad JL, Norell MA (2007) A complete Late Cretaceous iguanian (Squamata, Reptilia) from the Gobi and identification of a new iguanian clade. *Am Mus Novit*: 1-47.

**Table S3. Morphometric measurements (in mm) of additional examined specimens of species in the *Brookesia minima* group.**

Note that data for the newly described species are reported in Table 1 of main paper. Used abbreviations: M = male, F = female, J = juvenile; TL = total length; TaL = tail length; HW = head width; HH = head height; Eye = horizontal diameter of eye; rmL = arm length.

| Species / voucher number      | type status | Sex | TL   | SVL  | TaL  | HW  | HH  | ED  | FORL |
|-------------------------------|-------------|-----|------|------|------|-----|-----|-----|------|
| <i>Brookesia exarmata</i>     |             |     |      |      |      |     |     |     |      |
| ZSM 147/2006                  |             | F   | 40.1 | 25.7 | 14.4 | 4.3 | 4.1 | 2.3 | 8.0  |
| ZSM 72/2006                   |             | F   | 39.8 | 26.5 | 13.3 | 4.6 | 4.3 | 2.4 | 8.7  |
| <i>Brookesia minima</i>       |             |     |      |      |      |     |     |     |      |
| ZSM 443/2000                  |             | F   | 33.3 | 21.0 | 12.3 | 3.2 | 3.1 | 2.0 | 5.9  |
| ZSM 990/2003                  |             | M   | 33.9 | 20.6 | 13.3 | 3.4 | 2.8 | 2.2 | 5.3  |
| ZSM 1709/2004                 |             | M   | 29.9 | 17.8 | 12.1 | 2.8 | 2.6 | 1.5 | 5.4  |
| ZSM 814/2003                  |             | F   | 35.6 | 21.8 | 13.8 | 3.6 | 3.3 | 2.0 | 6.9  |
| <i>Brookesia ramanantsoai</i> |             |     |      |      |      |     |     |     |      |
| ZSM 10/2009                   |             | M   | 39.0 | 21.7 | 17.3 | 3.5 | 3.6 | 1.8 | 6.5  |
| ZSM 637/2000                  |             | F   | 43.5 | 24.9 | 18.6 | 3.7 | 3.7 | 2.1 | 7.6  |
| ZSM 638/2000                  |             | F   | 42.9 | 24.9 | 18.0 | 4.0 | 4.5 | 2.1 | 8.3  |
| <i>Brookesia karchei</i>      |             |     |      |      |      |     |     |     |      |
| ZSM 125/2005                  |             | F   | 51.0 | 30.7 | 20.3 | 5.3 | 4.9 | 3.0 | 10.4 |
| <i>Brookesia peyrierasi</i>   |             |     |      |      |      |     |     |     |      |
| ZSM 434/2005                  |             | F   | 41.8 | 27.3 | 14.5 | 4.7 | 4.3 | 2.5 | 7.9  |
| ZSM 433/2005                  |             | F   | 43.1 | 27.4 | 15.7 | 4.7 | 4.7 | 2.5 | 7.9  |
| ZSM 438/2005                  |             | F   | 40.6 | 25.2 | 15.4 | 4.4 | 4.2 | 2.3 | 8.3  |
| ZSM 436/2005                  |             | M   | 39.0 | 22.3 | 16.7 | 3.9 | 3.5 | 2.4 | 6.5  |

|                              |   |      |      |      |     |     |     |     |
|------------------------------|---|------|------|------|-----|-----|-----|-----|
| ZSM 437/2005                 | M | 37.2 | 21.3 | 15.9 | 3.6 | 3.2 | 2.2 | 6.7 |
| ZSM 4365/2005                | M | 34.2 | 19.7 | 14.5 | 3.7 | 3.4 | 2.1 | 7.4 |
| <i>Brookesia tuberculata</i> |   |      |      |      |     |     |     |     |
| ZSM 498/2000                 | M | 30.6 | 17.0 | 13.6 | 3.3 | 2.7 | 1.8 | 5.6 |
| ZSM 499/2000                 | M | 32.1 | 18.1 | 14.0 | 3.4 | 2.6 | 1.7 | 5.1 |
| ZSM 1039/2003                | M | 33.6 | 18.8 | 14.8 | 3.4 | 2.6 | 1.7 | 5.6 |
| ZSM 1038/2003                | M | 32.2 | 18.3 | 13.9 | 3.4 | 2.8 | 1.9 | 4.4 |
| ZSM 356/2004                 | F | 28.9 | 18.2 | 10.7 | 3.6 | 3.0 | 1.7 | 4.9 |
| ZSM 1708/2004                | M | 32.9 | 18.2 | 14.7 | 3.2 | 2.9 | 1.9 | 5.5 |
| ZSM 2098/2007                | M | 30.7 | 17.3 | 13.4 | 3.5 | 2.9 | 1.8 | 5.8 |
| ZSM 2097/2007                | M | 31.4 | 18.7 | 12.7 | 3.5 | 3.0 | 1.8 | 5.7 |
| ZSM 2099/2007                | M | 32.5 | 18.5 | 14.0 | 3.5 | 3.0 | 1.8 | 6.1 |
| ZSM 2100/2007                | M | 32.8 | 18.6 | 14.2 | 3.3 | 2.9 | 2.1 | 5.7 |
| ZSM 2096/2007                | F | 34.6 | 21.7 | 12.9 | 4.5 | 3.9 | 1.9 | 6.1 |
| ZSM 2114/2007                | J | 17.4 | 10.0 | 7.4  | 2.4 | 2.2 | 1.4 | 3.5 |

---



**Table S4. Variation of selected morphological characters in examined specimens of the *Brookesia minima* group.**

| species                                        | number of dorsolateral spines on body | pelvic spine | supraocular cone | supranasal cone | lateral spines on tail | dorsal spines on tail | number of enlarged tubercles at lateral side of head | posterior crest |
|------------------------------------------------|---------------------------------------|--------------|------------------|-----------------|------------------------|-----------------------|------------------------------------------------------|-----------------|
| <i>B. minima</i>                               |                                       |              |                  |                 |                        |                       |                                                      |                 |
| ZSM 990/2003                                   | not countable                         | indistinct   | no               | ambiguous       | indistinct             | no                    | 1                                                    | yes             |
| ZSM 1709/2004                                  | 14 (indistinct)                       | indistinct   | no               | ambiguous       | yes                    | yes                   | 1                                                    | yes             |
| ZSM 17/1921                                    | not countable                         | no           | no               | ambiguous       | no                     | no                    | 2                                                    | indistinct      |
| <i>B. ramanantsoai</i>                         |                                       |              |                  |                 |                        |                       |                                                      |                 |
| ZSM 638/2000                                   | 4 (irregular)                         | yes          | no               | yes             | no                     | no                    | 0                                                    | indistinct      |
| ZSM 637/2000                                   | 4 (irregular)                         | yes          | no               | yes             | no                     | no                    | 1                                                    | indistinct      |
| ZSM 10/2009                                    | 4 (irregular)                         | yes          | yes              | yes             | no                     | no                    | 0                                                    | indistinct      |
| ZSM 285/2010                                   | 8 (left), 11 (right)                  | yes          | yes              | yes             | no                     | no                    | 2                                                    | no              |
| <i>B. dentata</i> (based on photos of A. Mori) | 10-11                                 | yes          | no               | yes             | indistinct             | distinct              | 2-3                                                  | yes             |
| <i>B. peyrierasi</i>                           |                                       |              |                  |                 |                        |                       |                                                      |                 |
| ZSM 447/2010                                   | 10-11 (indistinct)                    | yes          | indistinct       | yes             | indistinct             | no                    | 1                                                    | yes             |
| ZSM 430/2005                                   | 10 (indistinct)                       | yes          | no               | yes             | no                     | no                    | 1                                                    | indistinct      |
| ZSM 437/2005                                   | 10 (indistinct)                       | yes          | no               | yes             | no                     | no                    | 1                                                    | indistinct      |
| ZSM 433/2005                                   | 11                                    | yes          | no               | yes             | no                     | no                    | 1                                                    | indistinct      |
| ZSM 434/2005                                   | 10                                    | yes          | no               | yes             | yes                    | no                    | 1                                                    | yes             |
| ZSM 438/2005                                   | 10 (indistinct)                       | yes          | no               | yes             | yes                    | no                    | 1                                                    | indistinct      |
| ZSM 435/2005                                   | not countable                         | yes          | no               | yes             | indistinct             | no                    | 1 (indistinct)                                       | indistinct      |
| <i>B. exarmata</i>                             |                                       |              |                  |                 |                        |                       |                                                      |                 |
| ZSM 72/2006                                    | 12 (small)                            | yes          | no               | yes             | no                     | no                    | 1                                                    | yes             |
| ZSM 147/2006                                   | 11 (indistinct)                       | yes          | no               | yes             | no                     | no                    | 1                                                    | indistinct      |
| <i>B. tuberculata</i>                          |                                       |              |                  |                 |                        |                       |                                                      |                 |
| ZSM 1708/2004                                  | indistinct                            | small        | yes              | yes             | no                     |                       | 1                                                    | yes             |
| ZSM 2098/2007                                  | 9 (indistinct)                        | yes          | yes              | yes             | yes                    | no                    | 2                                                    | yes             |
| ZSM 2100/2007                                  | not countable                         | yes          | yes              | yes             | yes                    | no                    | 1                                                    | indistinct      |
| ZSM 2097/2007                                  | not countable                         | indistinct   | yes              | yes             | no                     | no                    | 1                                                    | indistinct      |
| ZSM 2097/2007                                  | not countable                         | indistinct   | yes              | yes             | yes                    | no                    | 2                                                    | indistinct      |

|                     |                           |            |            |     |            |            |        |            |
|---------------------|---------------------------|------------|------------|-----|------------|------------|--------|------------|
| ZSM 2099/2007       | not countable             | indistinct | yes        | yes | no         | no         | 1      | indistinct |
| ZSM 2096/2007       | not countable             | yes        | yes        | yes | indistinct | no         | 1      | indistinct |
| <i>B. karchei</i>   |                           |            |            |     |            |            |        |            |
| ZSM 125/2005        | 13                        | yes        | yes        | yes | yes        | indistinct | 1      | yes        |
| <i>B. desperata</i> |                           |            |            |     |            |            |        |            |
| ZSM 2170/2007 (HT)  | 13                        | yes        | indistinct | yes | strong     | indistinct | 3      | yes        |
| ZSM 2171/2007       | 13                        | yes        | indistinct | yes | strong     | yes        | 3      | yes        |
| ZSM 2172/2007       | 13                        | yes        | yes        | yes | strong     | no         | 3      | yes        |
| ZSM 2173/2007       | 14                        | yes        | indistinct | yes | strong     | yes        | 3      | yes        |
| ZSM 2174/2007       | 13                        | yes        | indistinct | yes | strong     | indistinct | 3      | yes        |
| ZSM 2175/2007       | 12                        | yes        | indistinct | yes | strong     | no         | 3      | yes        |
| ZSM 2176/2007       | 14                        | yes        | indistinct | yes | strong     | yes        | 3      | yes        |
| ZSM 2177/2007       | 13                        | yes        | indistinct | yes | strong     | yes        | 3      | yes        |
| ZSM 2178/2007       | 13                        | yes        | yes        | yes | strong     | indistinct | 2 (+1) | yes        |
| ZSM 2179/2007       | 13                        | yes        | small      | yes | strong     | no         | 3      | yes        |
| ZSM 1506/2008       | 13                        | yes        | indistinct | yes | strong     | indistinct | 2 (+1) | yes        |
| ZSM 2017/2008       | 13                        | yes        | yes        | yes | strong     | indistinct | 3      | yes        |
| <i>B. tristis</i>   |                           |            |            |     |            |            |        |            |
| ZSM 1704/2004 (HT)  | 11                        | yes        | no         | yes | indistinct | no         | 1      | yes        |
| ZSM 1705/2004       | 11                        | yes        | no         | yes | yes        | indistinct | 1      | yes        |
| ZSM 2146/2007       | 11 (indistinct)           | yes        | no         | yes | indistinct | no         | 1      | yes        |
| ZSM 2147/2007       | 11                        | yes        | no         | yes | indistinct | no         | 1      | yes        |
| ZSM 2148/2007       | 12                        | yes        | no         | yes | no         | indistinct | 1      | yes        |
| ZSM 2149/2007       | not countable             | indistinct | no         | yes | no         | no         | 1      | indistinct |
| ZSM 2018/2008       | 11                        | yes        | no         | yes | no         | indistinct | 1      | yes        |
| ZSM 354/2004        | 11                        | yes        | no         | yes | indistinct | no         | 1      | yes        |
| ZSM 1505/2008       | 12                        | yes        | no         | yes | indistinct | no         | 1      | yes        |
| ZSM 1706/2004       | 12                        | yes        | no         | yes | indistinct | no         | 1      | yes        |
| ZSM 1707/2004       | 10                        | yes        | no         | yes | no         | no         | 1      | yes        |
| <i>B. confidens</i> |                           |            |            |     |            |            |        |            |
| ZSM 2150/2007 (HT)  | 13 (indistinct)           | small      | no         | no  | indistinct | yes        | 1      | yes        |
| ZSM 2151/2007       | 12 (indistinct)           | small      | no         | no  | indistinct | indistinct | 2      | indistinct |
| ZSM 2152/2007       | 8 (indistinct )           | minute     | no         | no  | no         | yes        | 1 (+1) | no         |
| ZSM 2153/2007       | indistinct, not countable | yes        | no         | no  | no         | indistinct | 2      | indistinct |
| ZSM 1511/2008       | indistinct, not countable | minute     | no         | no  | no         | no         | 2      | yes        |

|                                             |                 |            |    |     |    |     |   |            |
|---------------------------------------------|-----------------|------------|----|-----|----|-----|---|------------|
| ZSM 1512/2008                               | 12              | yes        | no | no  | no | yes | 2 | yes        |
| <i>B. micra</i>                             |                 |            |    |     |    |     |   |            |
| ZSM 1509/2008                               | 11 (indistinct) | indistinct | no | yes | no | no  | 1 | yes        |
| ZSM 2181/2007 (HT)                          | 11              | small      | no | yes | no | no  | 1 | yes        |
| ZSM 2183/2007                               | 11              | yes        | no | yes | no | no  | 1 | yes        |
| ZSM 2184/2007                               | 12              | yes        | no | yes | no | no  | 1 | yes        |
| ZSM 2185/2007                               | 11              | yes        | no | yes | no | no  | 1 | yes        |
| ZSM 2187/2007                               | 11              | yes        | no | yes | no | no  | 1 | yes        |
| <i>B. sp. (aff. micra)</i><br>(Ampombofofo) | not countable   | indistinct | no | yes | no | no  | 1 | indistinct |
| ZSM 1508/2008                               |                 |            |    |     |    |     |   |            |

## Morphological identification key to the species of the *Brookesia minima* group

The following key should allow the morphological identification of adult specimens of species in the *B. minima* group, i.e. adult *Brookesia* specimens with a SVL of 30 mm or smaller and a TL of 48 mm or smaller (SVL only overlapping with *B. lolontany*, 28 mm, which however is easily distinguished by its laterally compressed body and elongated snout). The key is preliminary given the low number of individuals known and missing hemipenial information for some species.

1. Supranasal cone present ..... **2**  
Supranasal cone absent or ambiguous..... **11**
2. Supraocular cone present ..... **3**  
Supraocular cone absent or indistinct ..... **6**
3. Posterior crest on head present ..... **4**  
Posterior crest on head absent or indistinct ..... **5**
4. One enlarged lateral head tubercle ..... ***B. karchei***  
Three enlarged lateral head tubercles ..... ***B. desperata***
5. Pelvic spine distinct, adult male SVL > 20 mm, hemipenis ballon-like without ornamentation ..... ***B. ramanantsoai***  
Pelvic spine indistinct, adult male SVL < 20 mm, hemipenis narrow tubular with crown-like structure ..... ***B. tuberculata***
6. Dorsal spines on tail distinct ..... ***B. dentata***  
Dorsal spines on tail absent or indistinct..... **7**
7. Tail short (TAL/SVL 0.37–0.49), tail orange in life ..... ***B. micra***  
Tail longer (TAL/SVL > 0.50) ..... **8**
8. Lateral and dorsal spines on tail always absent, inhabits western dry forests ..... ***B. exarmata***  
Dorsal spines on tail absent or indistinct, lateral spines on tail sometimes present ..... **9**
9. Hemipenis small, spine-like papillae on apex ..... ***B. tristis***  
Hemipenis large ..... **10**
10. Hemipenis balloon-like without ornamentation ..... ***B. ramanantsoai***  
Hemipenis massive, bilobed, with 4 spines per lobe ..... ***B. peyrierasi***
11. Pelvic spine absent or very indistinct, body and legs very slender, hemipenis balloon-like without ornamentation ..... ***B. minima***  
Pelvic spine small but distinct, body and legs moderately robust, hemipenis very narrow with pustules on apex ..... ***B. confidens***

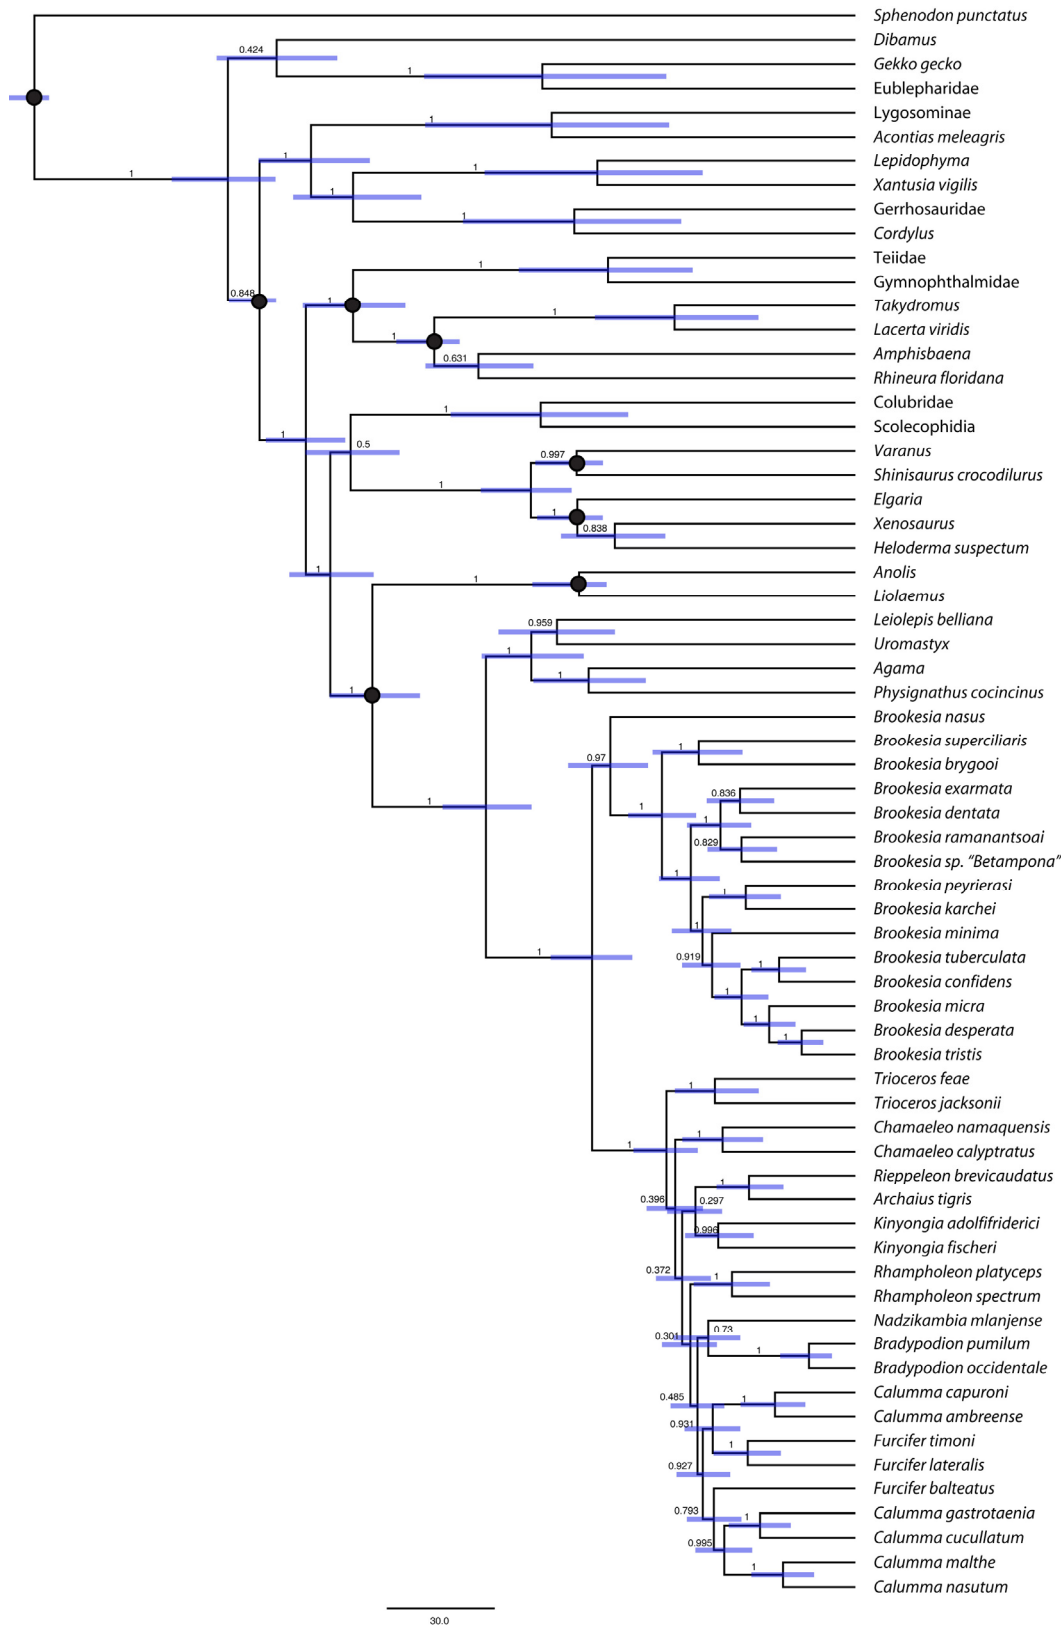

**Figure S1. Full Bayesian chronogram derived from the BEAST analyses.** Posterior probabilities are shown above branches, and bars represent 95% HPDs for mean date estimates. Black dots on nodes indicate calibration points (see Supplementary Methods). Units on scale are millions of years.

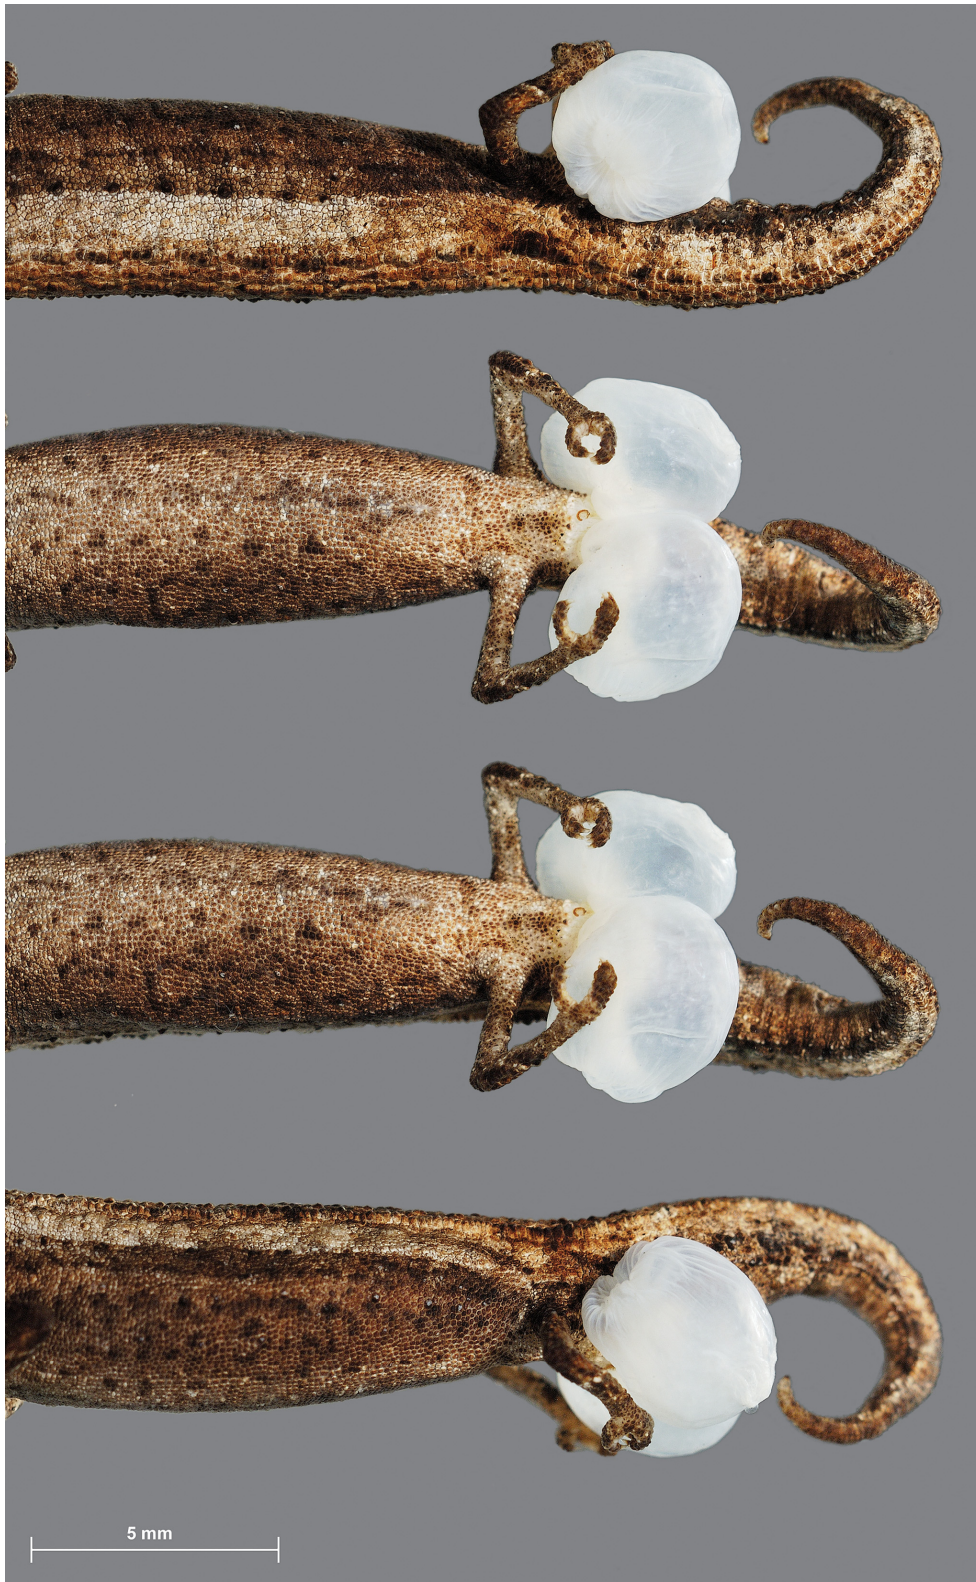

**Figure S2. Male genital morphology of *Brookesia minima*.**

Posterior body of preserved male specimen (lateral views and ventral view) of *B. minima* from Manongarivo (ZSM 900/2003) with everted hemipenes, showing the globular shape of hemipenes typical for *B. minima* and *B. ramanantsoai*.

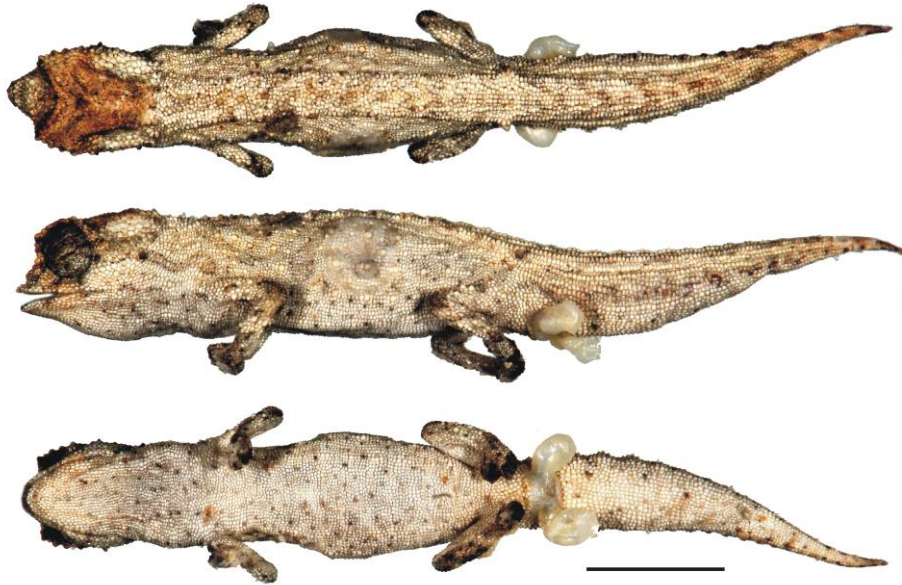

**Figure S3.** Dorsal, lateral and ventral views of preserved male holotype of *Brookesia tristis* (ZSM 1704/2004). Scale bar equals 5 mm.

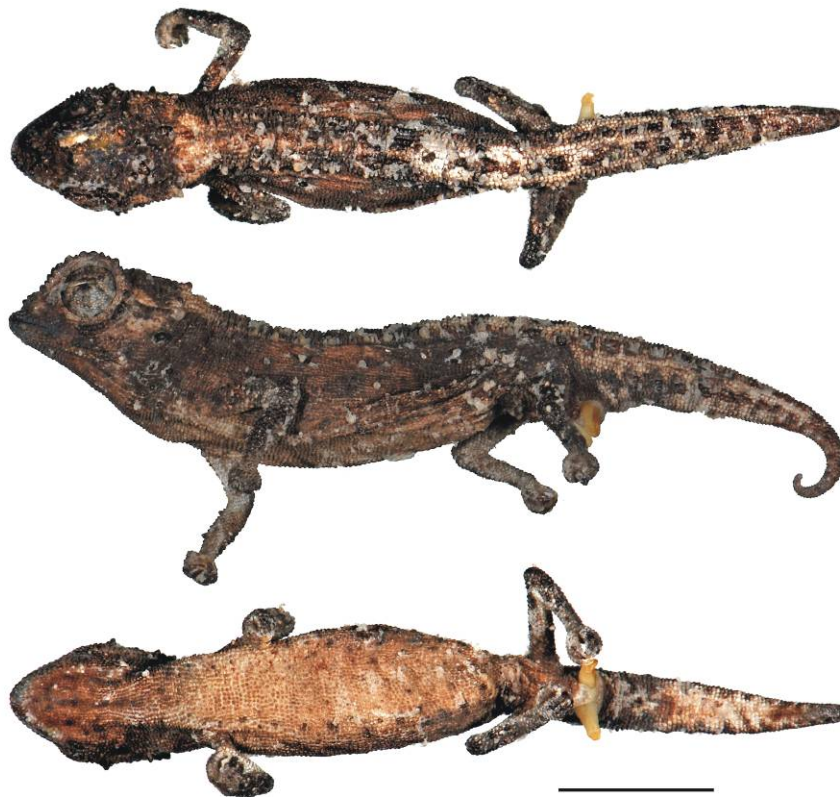

**Figure S4.** Dorsal, lateral and ventral views of preserved male holotype of *Brookesia confidens* (ZSM 2150/2007). Scale bar equals 5 mm.

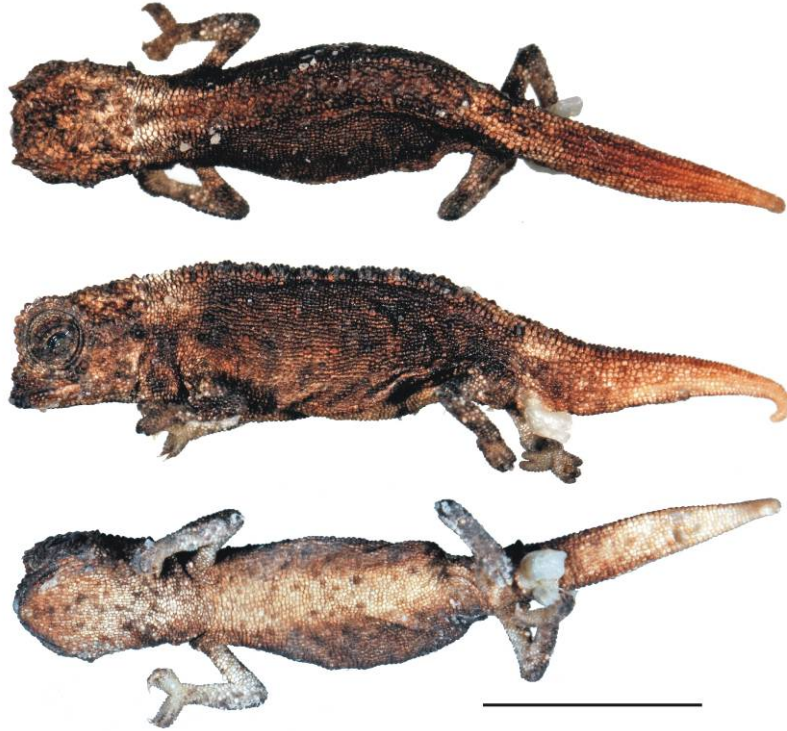

**Figure S5.** Dorsal, lateral and ventral views of preserved male holotype of *Brookesia micra* (ZSM 2181/2007). Scale bar equals 5 mm.

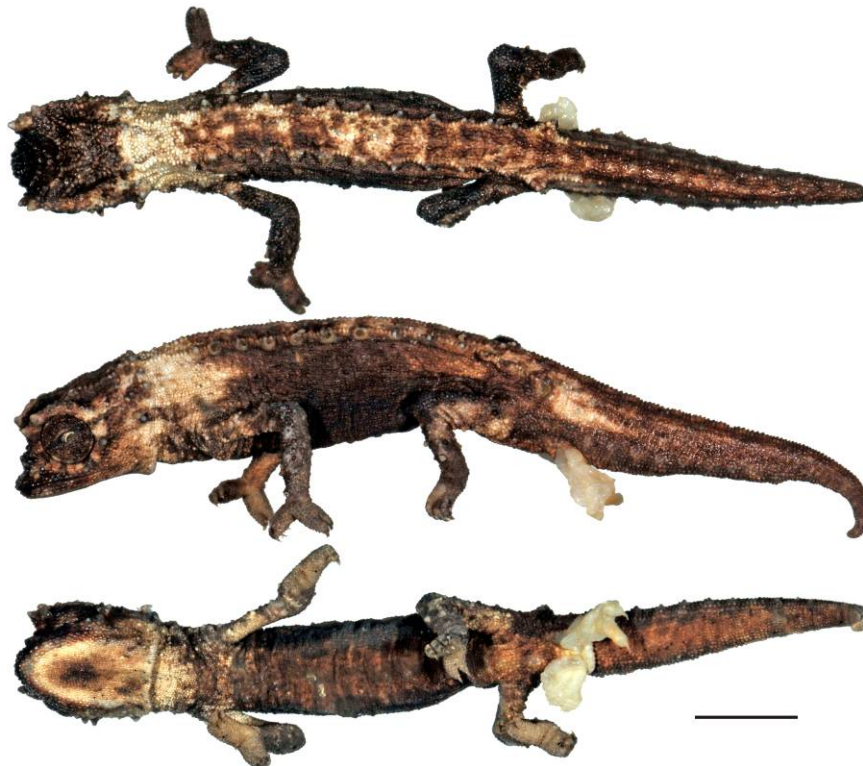

**Figure S6.** Dorsal, lateral and ventral views of preserved male holotype of *Brookesia desperata* from Forêt d'Ambre (ZSM 2170/2007). Scale bar equals 5 mm.
